# Supplementary material for: Identification of a gefitinib resistance-associated signature for predicting prognosis and therapeutic response in lung adenocarcinoma via integrated multi-omics analysis and machine learning
Source: Research Square preprint supplement (doi:10.21203/rs.3.rs-4573455/v1), 2024-07-16
Supplement: Supplementary file 1 [file 2039c886cba22029525fee3a.docx]

**Supplementary data**


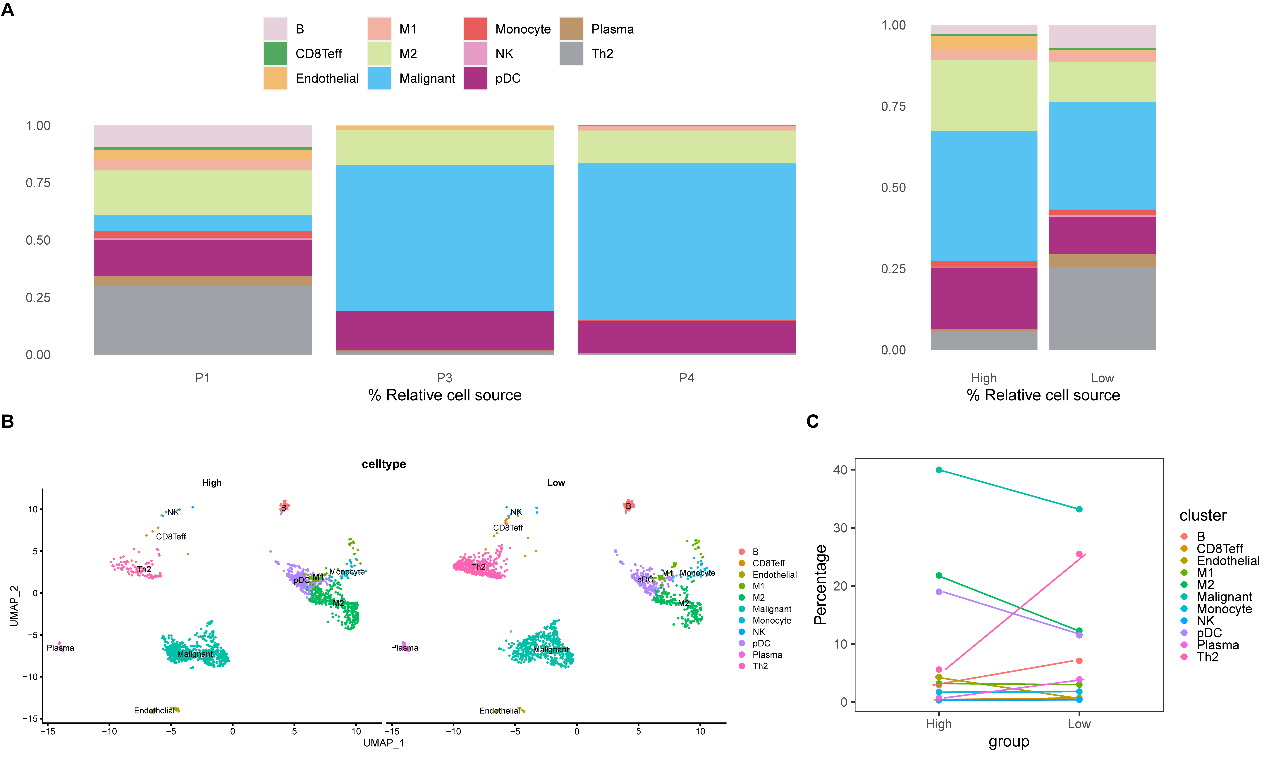


**Sup Fig.1** **Comparison of cell distribution between high and low resistance groups**.

(A) The proportion of each type of cells in each sample (left) and each resistance group (right). (B) UMAP plot of the distribution of cells in high and low resistance groups. (C) The changing trend of the proportion of each type of cells between high and low resistance groups.


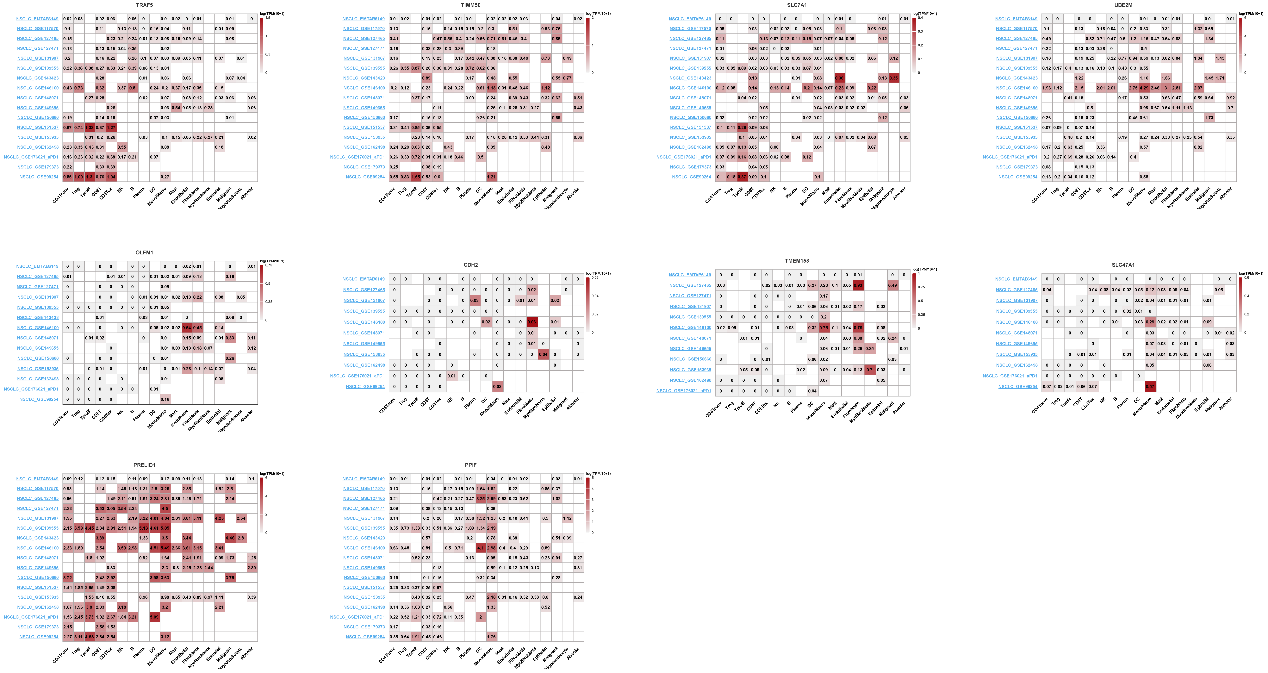


**Sup Fig.2 Expression of Random Forest algorithm top10 genes in each cell of multiple lung cancer single-cell datasets.**


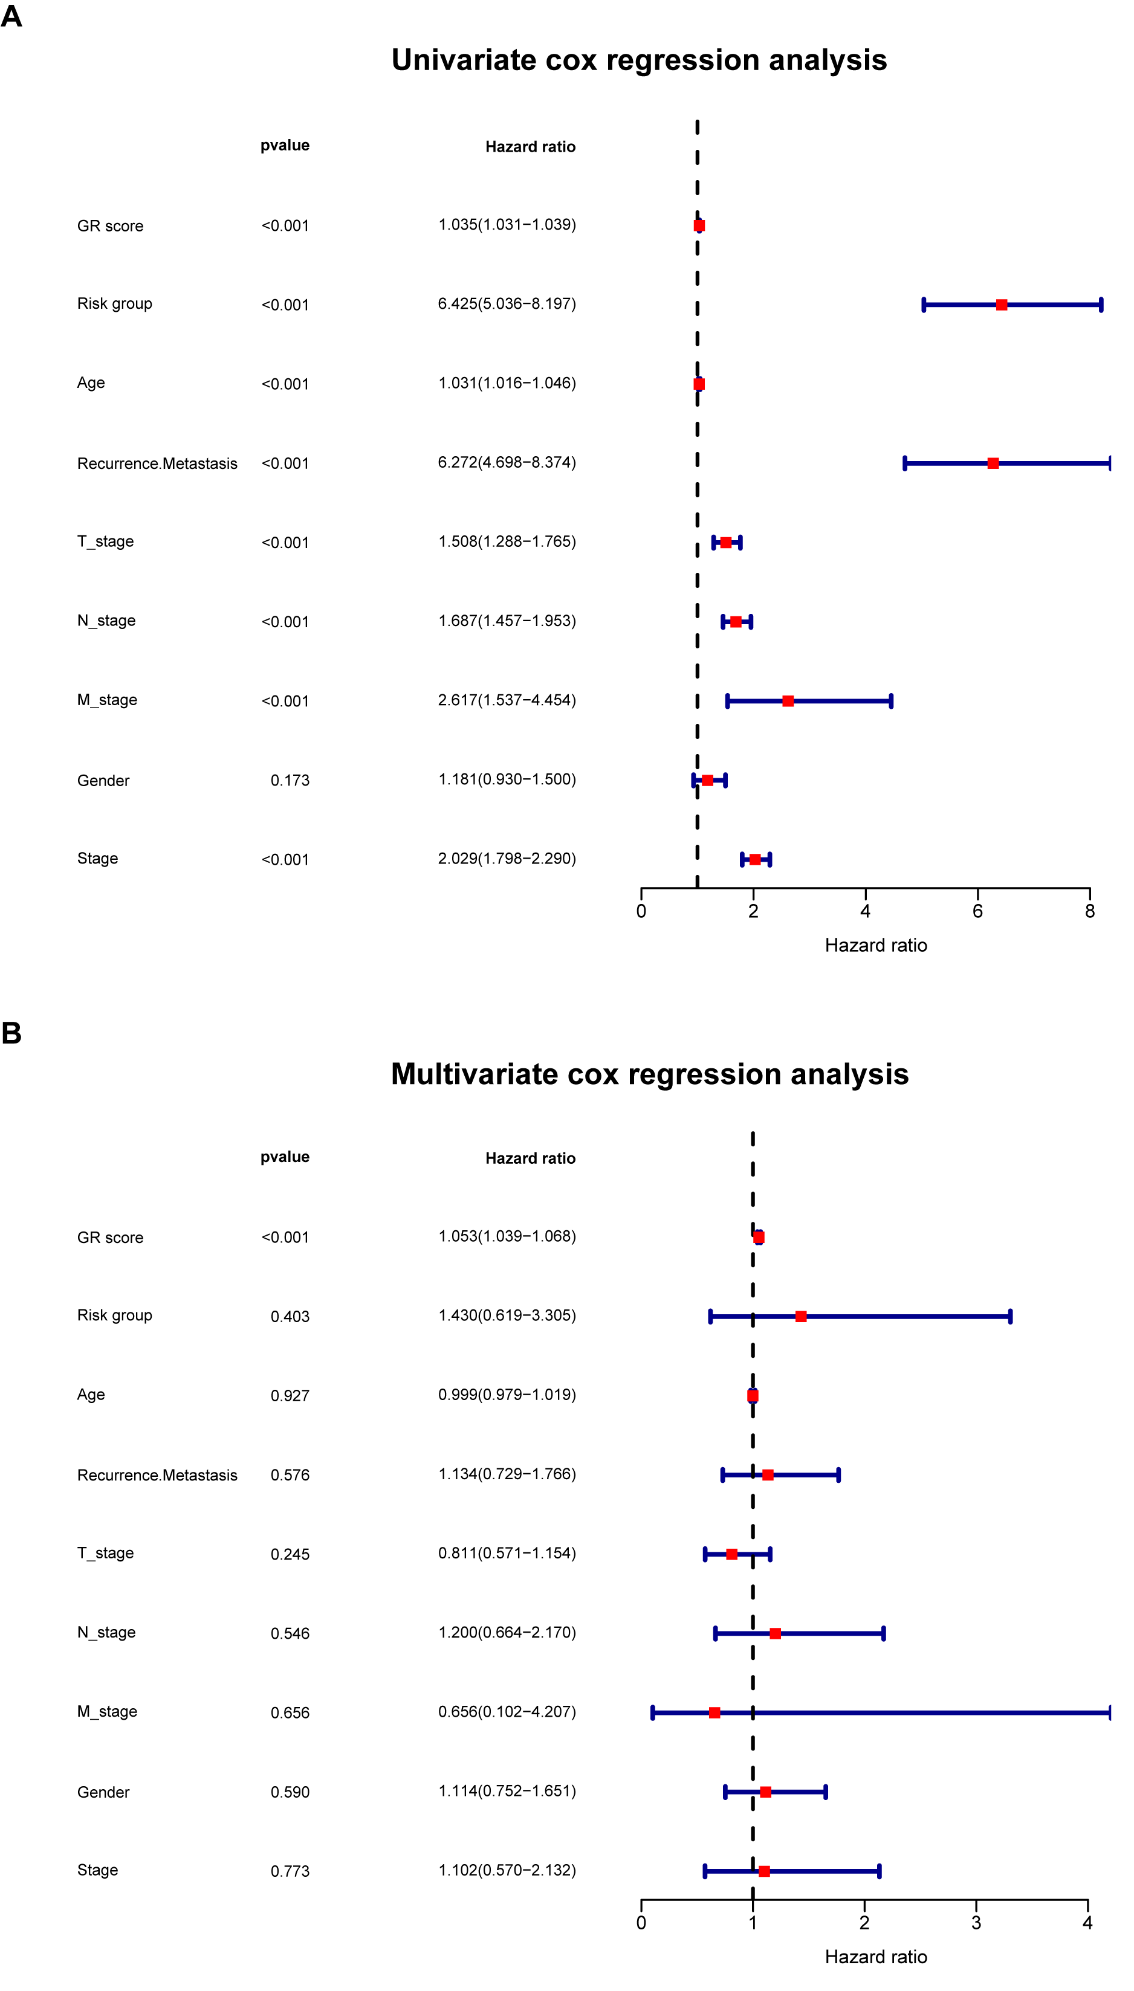


**Sup Fig3.** **Univariate (A) and multivariate (B) regression analysis of Gefitinib resistance score and risk group with various clinical characteristics**


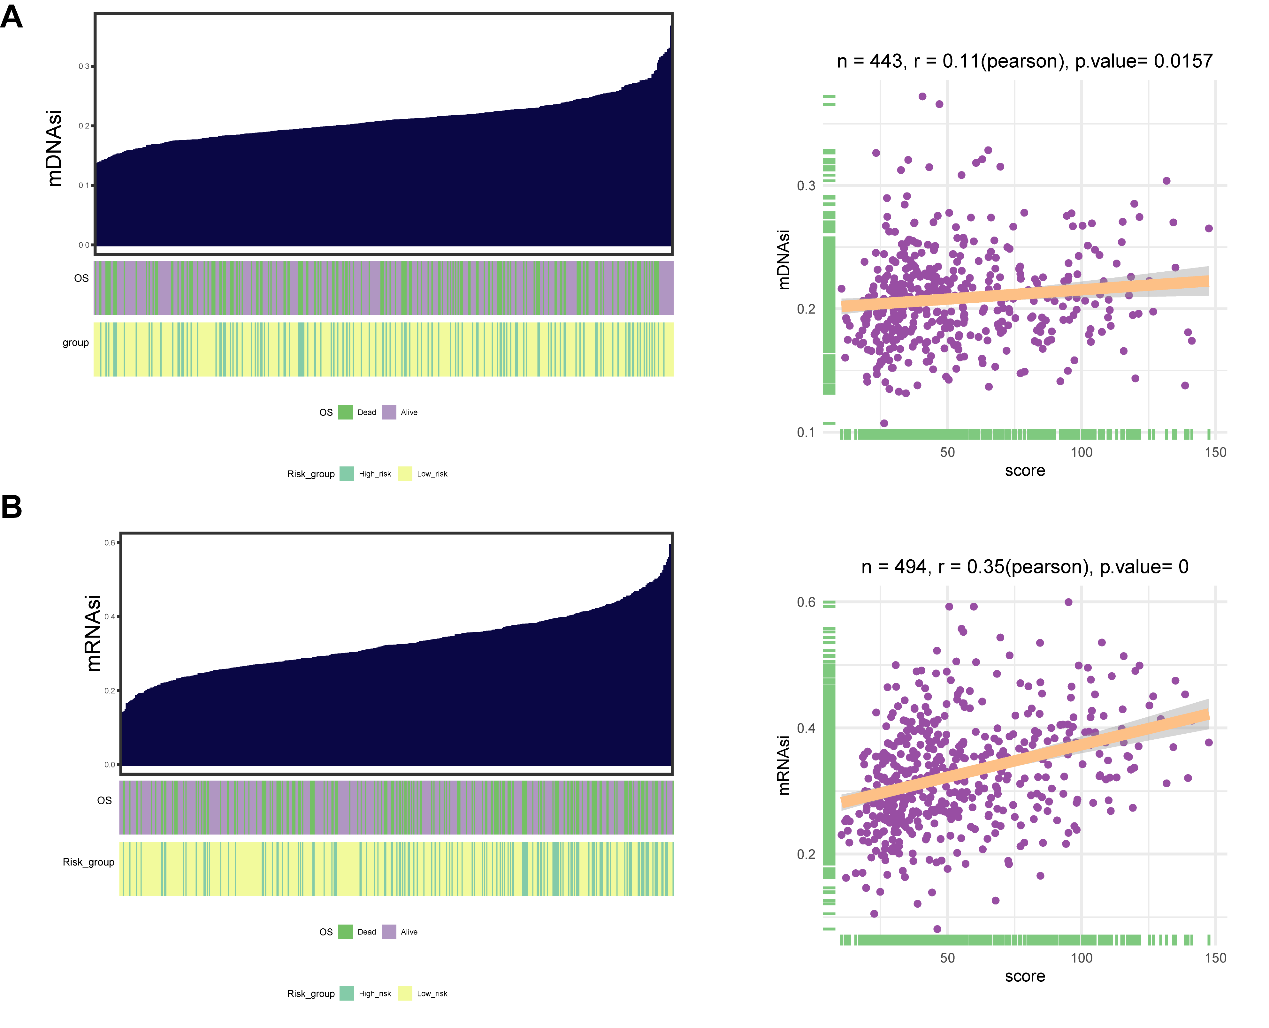


**Sup Fig.4 The relationship between GR signature and stemness index based on methylation and transcriptome data**.

(A) Distribution of the risk groups within the mDNAsi curves (left). Pearson correlation analysis between GR signature scores and mDNAsi scores (right). (B) Distribution of the risk groups within the mRNAsi curves (left). Pearson correlation analysis between GR signature scores and mRNAsi scores (right).


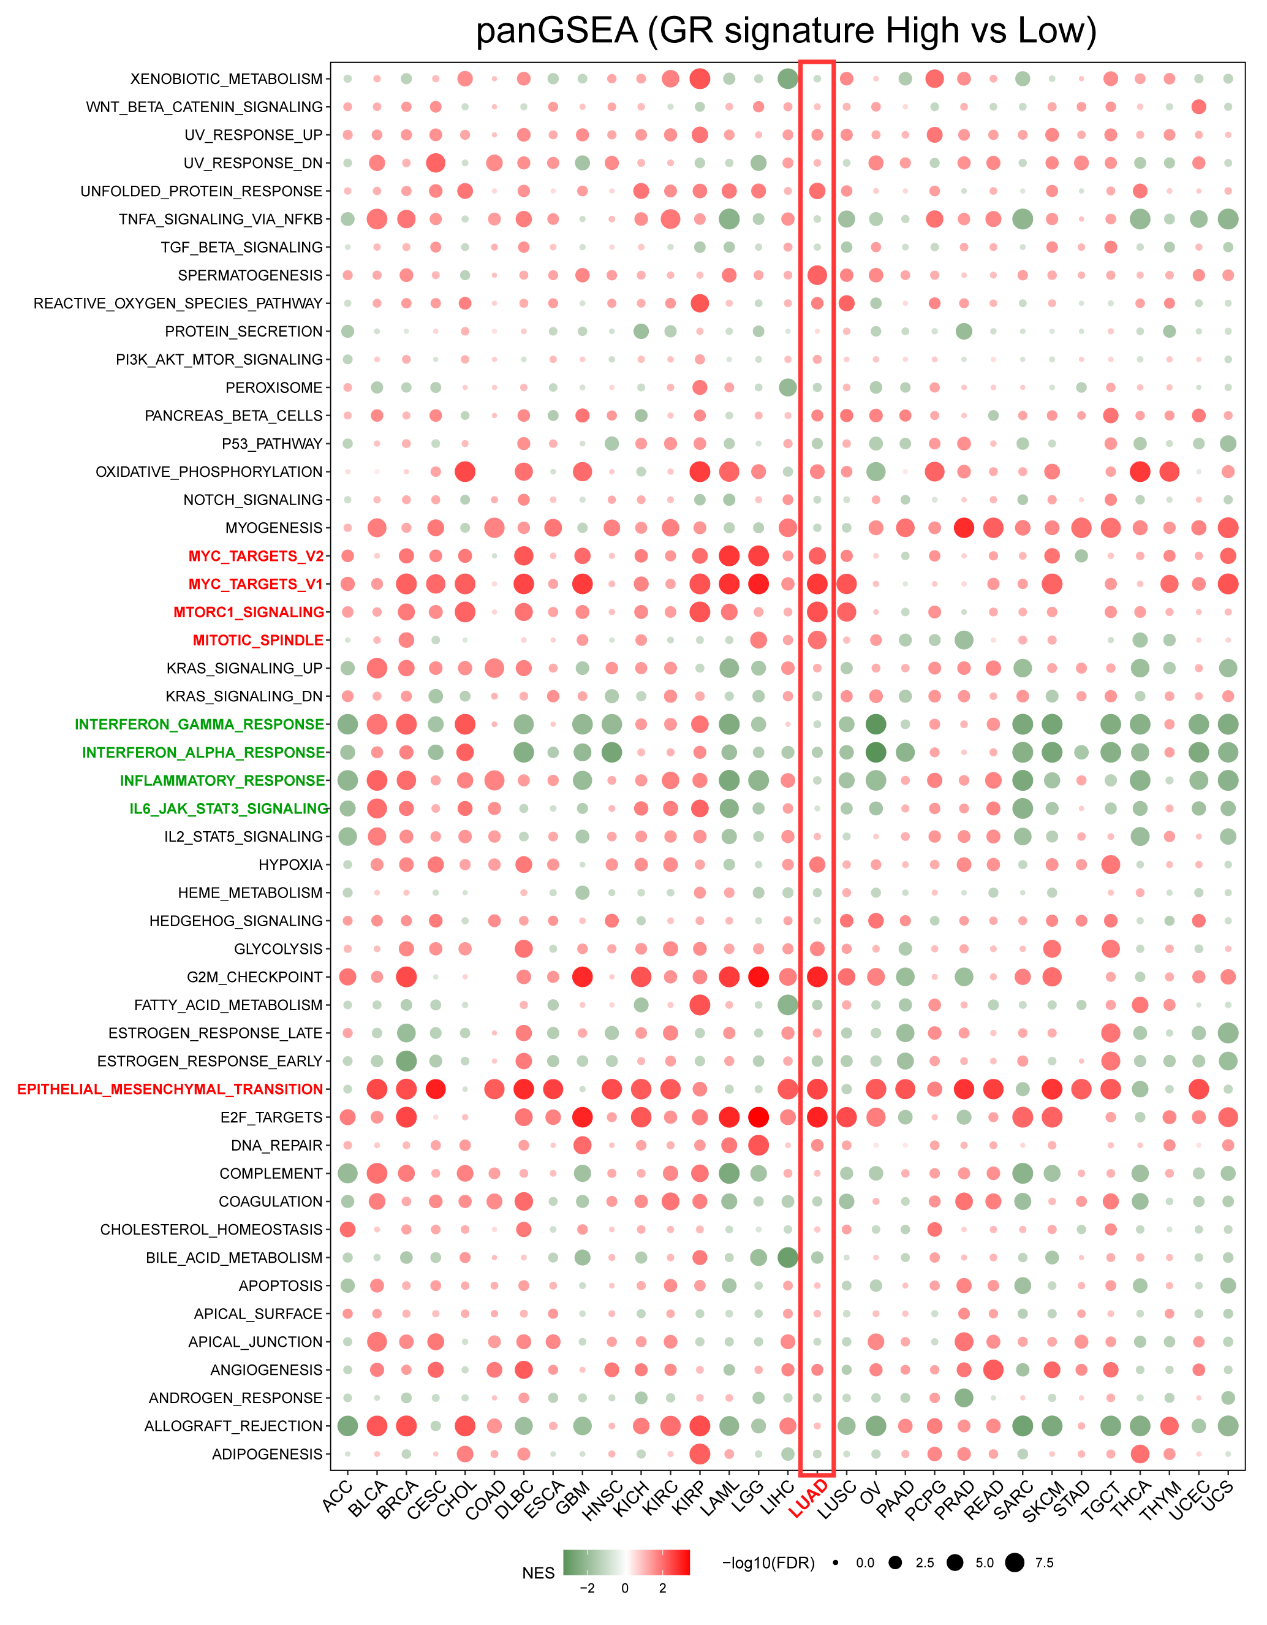


**Sup Fig.5 GSEA for pan-cancer samples grouped by GR signature scores.**


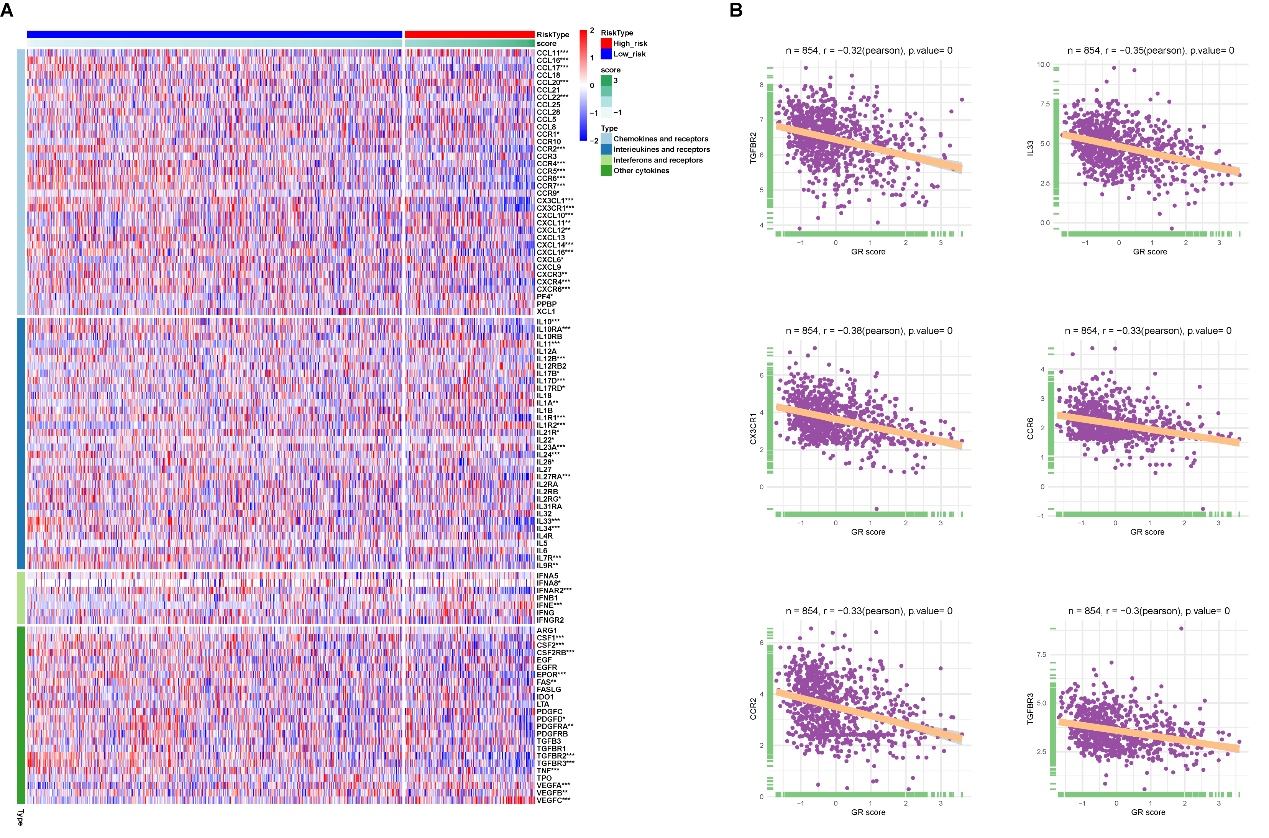


**Sup Fig.6 Correlation analysis between GR signature and expression of various chemokines and receptors**.

(A) Heat map of the expression levels of various chemokines and receptors in the samples of the high and low risk groups. (B) Pearson correlation analysis between six representative chemokines and receptors and GR signature scores.

Table S1 The specific qPCR primers for these screened genes

| Name |  | Primer Sequence (5′–3′) |
| --- | --- | --- |
| NAA10 | F | GCGAGGCCAGAGGACCTAA |
| R | AGCCAATGAGGTGATATGTCCA |
| SLC47A1 | F | TTCATAAGCTCCGTGTTCTGTG |
| R | AGTGACATTGATAACCGCGATT |
| UBE2M | F | ATGAGGGCTTCTACAAGAGTGG |
| R | ATTGTCTCACACTTCACCTTGG |
| OLFM1 | F | AGGGCAGGTGTATCTGCAC |
| R | CCGTGAACACATGGTCTGCT |
| SLC7A1 | F | GTCCTGCTCAACATTGGGCA |
| R | CAGGGCCTGCATTCTCACG |
| TRAF5 | F | CCACTCGGTGCTTCACAAC |
| R | GTACCGGCCCAGAATAACCT |
| TIMM50 | F | GGCAATAAGTGTGATCCCTTCC |
| R | GAAGCCCGAGAGAGACCAA |
| PPIF | F | GAAGGCAGATGTCGTCCCAAA |
| R | GGAAAGCGGCTTCCGTAGAT |
| TMEM158 | F | CTGAACCGTAAGCCCATTGAG |
| R | CGCTCCACACCACGATGAC |
| PRELID1 | F | CTTGACGGAAGACATAGTACACC |
| R | ACATTGGCAGGAAATAGTCGC |
| CDH2 | F | AGCCAACCTTAACTGAGGAGT |
| R | GGCAAGTTGATTGGAGGGATG |
| IKBIP | F | GCTCATCTAAAGCGTCTACAGG |
| R | AAGCGTCGTCAGACTGTTGTT |
| PPP2R1B | F | CTTGTGTCAGTATTGCCCAGT |
| R | TGCTGCTTGTCGAAGTGTAGG |
| TUB | F | CCCAGCTAAATAGTAACACCCG |
| R | ATGCGGCATTTGATGGTGATA |
| CEBPG | F | ACTCCAGGGGTGAACGGAAT |
| R | CATGGGCGAACTCTTTTTGCT |
| UCHL1 | F | CCTGTGGCACAATCGGACTTA |
| R | CATCTACCCGACATTGGCCTT |
| NFKBIZ | F | AGAGGCCCCTTTCAAGGTGT |
| R | TCCATCAGACAACGAATCGGG |
| MDM4 | F | TGATTGTCGAAGAACCATTTCGG |
| R | TGCAGGGATCAAAAAGTTTGGAG |
| UBA2 | F | TTCTCCCACATCGACCTGATT |
| R | ACCTGTGCCTTTGATCTTCCA |
| MAP1B | F | ATCTCGACACTCTGCAAGATTCT |
| R | TGTTTCTAAAACGTCACTTCGGT |
| LIX1L | F | GCCCTCCTTATGTCTGCTATGT |
| R | ACTCATCAGTGATTCTTCGGGA |
| ALDH1B1 | F | CCCATTCTGAACCCAGACATC |
| R | AATGACCTCCCCGGTGGTA |
| GAPDH | F | GGAGCGAGATCCCTCCAAAAT |
| R | GGCTGTTGTCATACTTCTCATGG |

F: Forward, R: Reverse.
